# Supplementary material for: Polymorphous α- and β-Ni(OH)2 complex architectures: morphological and phasal evolution mechanisms and enhanced catalytic activity as non-enzymatic glucose sensors
Source: Royal Society of Chemistry journal article supplement (doi:10.1039/c2ce25622c), 2012-01-01
Supplement: c2ce25622c.pdf [file c2ce25622c.pdf]

## Supporting Information

# Polymorphous $\alpha$ - and $\beta$ -Ni(OH)<sub>2</sub> Complex Architectures: Morphological and Phasal Evolution Mechanism and Enhanced Catalytic Activity as Non-enzymatic Glucose Sensors

Guo-Xiu Tong<sup>□,\*†‡</sup>, Fang-Ting Liu,<sup>†</sup> Wen-Hua Wu,<sup>†</sup> Jia-Ping Shen,<sup>†</sup> Xian Hu,<sup>†</sup> and Yan Liang,<sup>\*,‡</sup>

<sup>†</sup>College of Chemistry and Life Sciences, Zhejiang Normal University, Jinhua 321004, People's Republic of China

<sup>‡</sup>Croucher Institute for Environmental Sciences and the Department of Biology, Hong Kong Baptist University, Kowloon Tong, Hong Kong, People's Republic of China

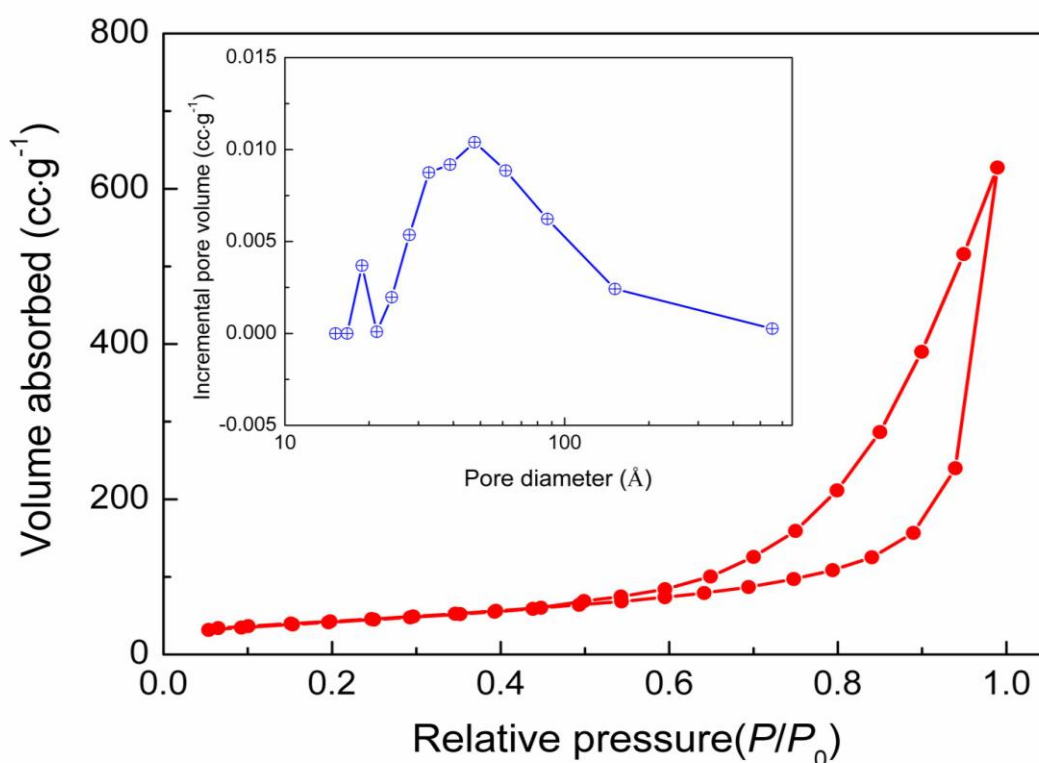

**Figure S1.** Nitrogen adsorption/desorption isotherm of the  $\beta$ -Ni(OH)<sub>2</sub> samples and their corresponding pore size distribution curves (inset).

As shown in the figure, the flower-like  $\beta$ -Ni(OH)<sub>2</sub> nanostructures showed type IV isotherms with H3 hysteresis loops according to BDDT classification. The  $\beta$ -Ni(OH)<sub>2</sub> samples had a large  $S_{\text{BET}}$  of 152.77 m<sup>2</sup>·g<sup>-1</sup>, pore volume of 1.033 cc·g<sup>-1</sup>, and average pore size of 4.76 nm. As shown in the insets of Figure S1, the flower-like  $\beta$ -Ni(OH)<sub>2</sub> nanostructures had a bimodal pore-size distribution, containing small mesopores (peak pore ca. 18.6 nm) and large mesopores (peak pore ca. 47.5 nm).
